# Supplementary material
Source: Springer Nature journal article supplement (https://mijn.bsl.nl/resource/supplementary/13047_2013_592_MOESM10_ESM.pdf/7113170)

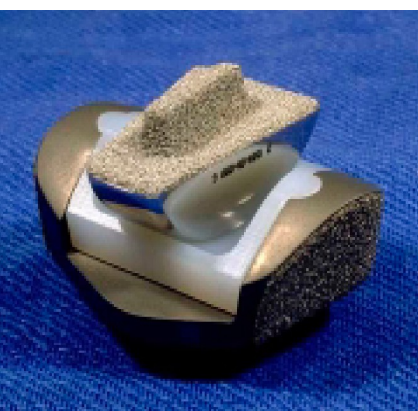

Agility

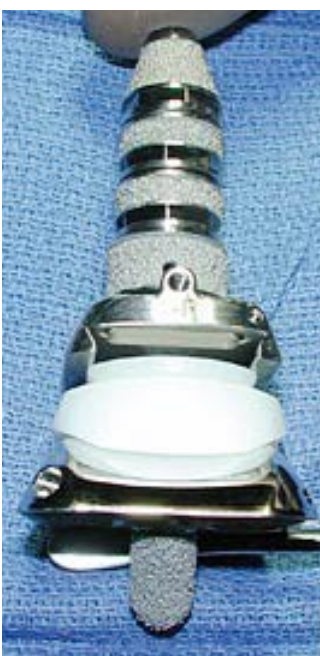

Inbone

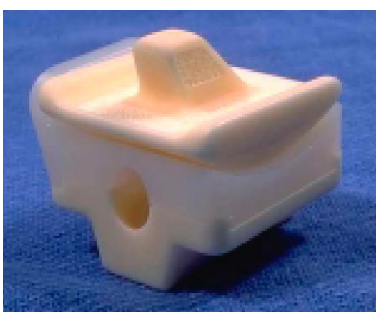

TNK

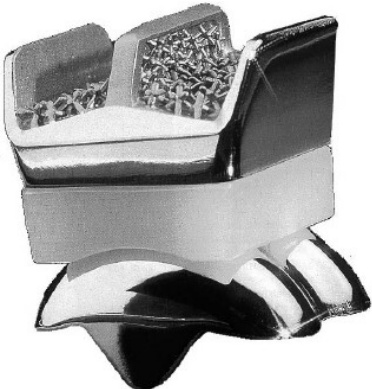

Eska

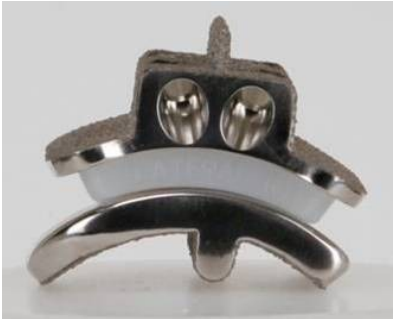

Eclipse

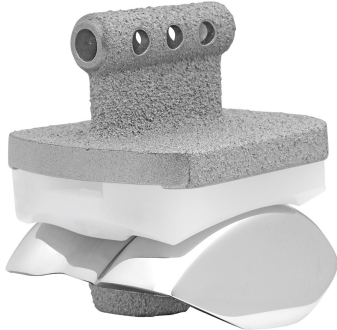

Salto Talaris

Supplement: MOESM10 [file 7113170]
